# Supplementary material for: Optimized culture of primary human alveolar type II cell–derived 3D organoids from fibrotic lung tissue with phenotypic and metabolic profiling
Source: Respir Res. 2026 Mar 7;27:164. doi: 10.1186/s12931-026-03610-9 (PMC13067506; doi:10.1186/s12931-026-03610-9)
Supplement: Supplementary file 2 — Supplementary Material 2. Supp. Table 1. Serum-free feeder-free medium. Components for generation of AT-II cell culturing medium [file 12931_2026_3610_MOESM2_ESM.xlsx]

## Sheet: Tabelle1
Product	Seller& Catalogue number	Concentration	Volume per 50ml medium
SB431542	Abcam Cat:#Ab120163	(300 mM)	15µL
CHIR99021	Tocris Bioscience #Cat. No 4423	(20 mM)	30 µL
BIRB796	Tocris Bioscience #Cat. No H3149	(20 mM)	10 µL
Insulin-Transferrin-Selenium (ITS) (100x)	ThermoFisher Scientific #Cat. No 41400-045	1X	500 µL
HEPES (1 M)	ThermoFisher #Cat. No 15630080	15 mM	750 µL
Glutamax (100x)	ThermoFisher #Cat. No 35050061	1X	500 µL
Pen/Strep	Bio&Sell #Cat. No BS-AB17.07350	100X	500 µL
hEGF (1 mg/mL)	Gibco #Cat. No PHG0313	50 ng/mL	2.5 µL
Heparinsodium (50 mg/mL)	Sigma Aldrich #Cat. No H3149 207 U	5 µg/mL	5 µL
B27 (50x)	Thermo Fisher scientific #Cat. No 17504001	1x	1 mL
N2 (100x)	Thermo Fisher scientific #Cat. No 17502001	1X	500 µL
N-Acetyl Cysteine (500 mM)	Sigma-Aldrich #Cat. No A9165	1.25 mM	125 µL
Y27632 (50 mM)	Selleckchem #Cat. No S1049	20 µM	20 µL
hFGF10 (50 µg/mL)	PEPROTECH #Cat. No 100-26	10 ng/mL	10 µL
hIL-1b* (10 mg/mL)	PEPROTECH #Cat. No 200-01B-1MG	10 ng/mL	50 µL
Advanced DMEM/F12	Thermo Fisher scientific #Cat. No 12634028	1X	45.902 µL
* hIL-1ß is only added from cultivation day 0-4, with longer addition the morphology of the AT2 cells changes and they lose SFTPC expression
